# Supplementary material for: Compound mortality impacts from extreme temperatures and the COVID-19 pandemic
Source: PubMed Central journal article supplement (PMC11116452; doi:10.1038/s41467-024-48207-2), 2024-05-23
Supplement: 41467_2024_48207_MOESM1_ESM.pdf [file 41467_2024_48207_MOESM1_ESM.pdf]

# Compound mortality impacts from extreme temperatures and the COVID-19 pandemic

Y. T. Eunice Lo<sup>1,2,\*</sup>, Dann M. Mitchell<sup>1,3</sup> and Antonio Gasparrini<sup>4</sup>

<sup>1</sup> Cabot Institute for the Environment, University of Bristol, UK

<sup>2</sup> Elizabeth Blackwell Institute for Health Research, University of Bristol, UK

<sup>3</sup> School of Geographical Sciences, University of Bristol, UK

<sup>4</sup> Environment & Health Modelling (EHM) Lab, Department of Public Health Environments and Society, London School of Hygiene & Tropical Medicine, London, UK

## Supplementary information

- Figure S1
- Table S1
- Table S2
- Figure S2
- Figure S3
- Figure S4
- Figure S5
- Figure S6
- Figure S7

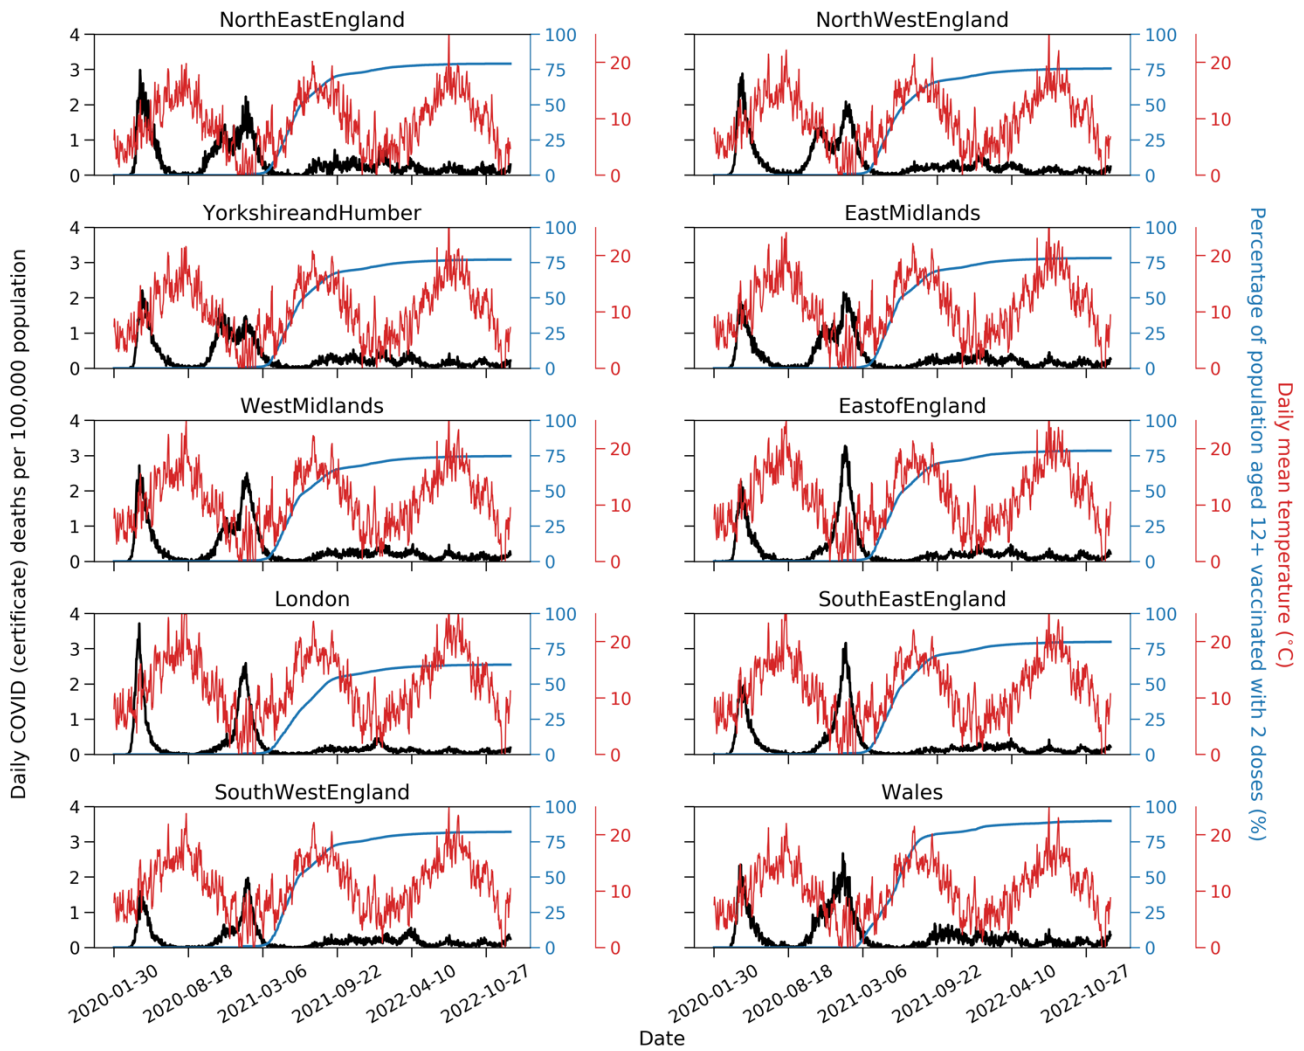

**Figure S1. Time series of daily COVID-19 deaths, daily mean temperature, and cumulated COVID-19 vaccination for all study regions.** The black lines show daily COVID-19 death occurrences indicated by death certificates, per 100,000 people in each region in England and Wales. The red lines show daily mean temperatures, and the blue lines show regional cumulated percentage of population aged 12+ who have had 2 doses of COVID-19 vaccines. This figure covers the study period, 30 January 2020 to 31 December 2022.

**Table S1. The cumulative percentage of people aged 12 and above who have received two doses of COVID-19 vaccines as of 1 July 2021.** The data are displayed by regions in England and Wales.

| Region               | Vaccine uptake (%) | Region             | Vaccine uptake (%) |
|----------------------|--------------------|--------------------|--------------------|
| North East England   | 53.9               | North West England | 50.9               |
| Yorkshire and Humber | 51.8               | East Midlands      | 53.1               |
| West Midlands        | 50                 | East of England    | 52.1               |
| London               | 35.9               | South East England | 51.8               |
| South West England   | 55                 | Wales              | 61.6               |

**Table S2. Start and end dates of heatwaves and cold snaps between 30 January 2020 and 31 December 2022.** All dates are in dd/mm/yyyy. "--" indicates no additional events that year.

| Year | Heatwaves  |            | Cold snaps |            |
|------|------------|------------|------------|------------|
|      | Start date | End date   | Start date | End date   |
| 2020 | 23/06/2020 | 27/06/2020 | 29/12/2020 | 18/01/2021 |
|      | 30/07/2020 | 01/08/2020 | --         | --         |
|      | 05/08/2020 | 15/08/2020 | --         | --         |
| 2021 | 16/07/2021 | 23/07/2021 | 22/01/2021 | 02/02/2021 |
|      | 06/09/2021 | 09/09/2021 | 08/02/2021 | 12/02/2021 |
|      | --         | --         | 26/11/2021 | 29/11/2021 |
|      | --         | --         | 20/12/2021 | 23/12/2021 |
| 2022 | 16/06/2022 | 19/06/2022 | 04/01/2022 | 10/01/2022 |
|      | 10/07/2022 | 25/07/2022 | 13/01/2022 | 17/01/2022 |
|      | 30/07/2022 | 05/08/2022 | 07/12/2022 | 18/12/2022 |
|      | 08/08/2022 | 17/08/2022 | --         | --         |
|      | 23/08/2022 | 25/08/2022 | --         | --         |

## Census 2021 population

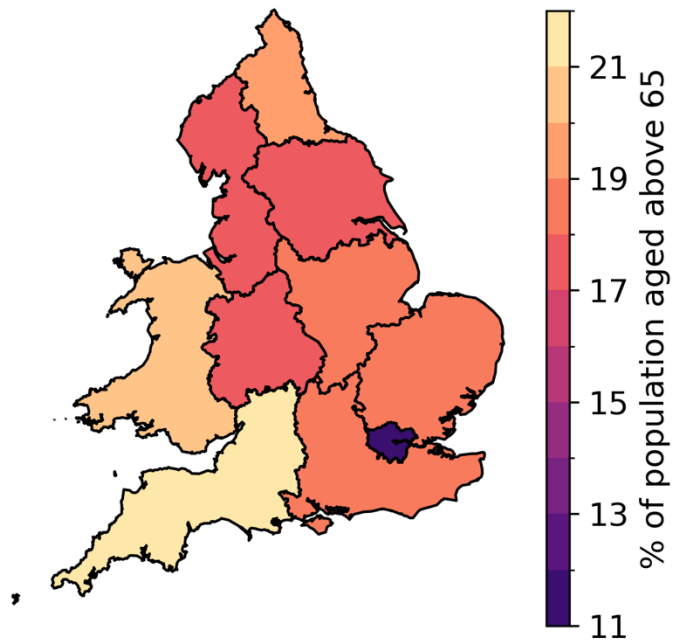

**Figure S2. Percentage of population who are above the age of 65 in all studied regions.**  
This figure is based on the 2021 Census.

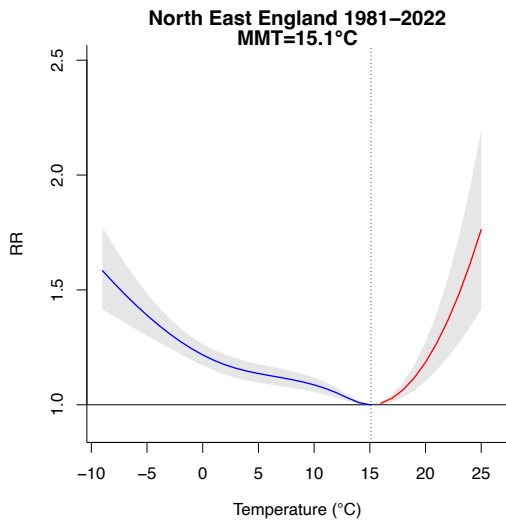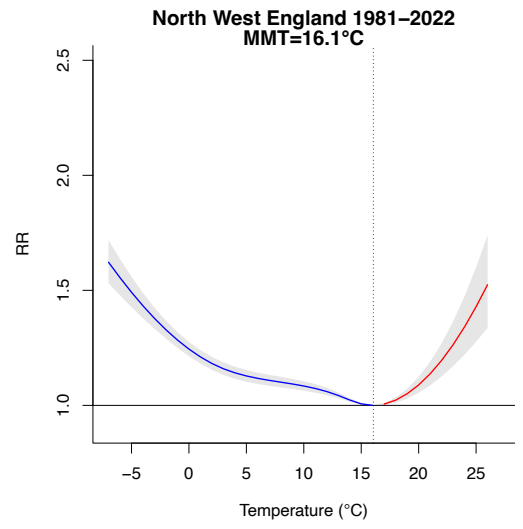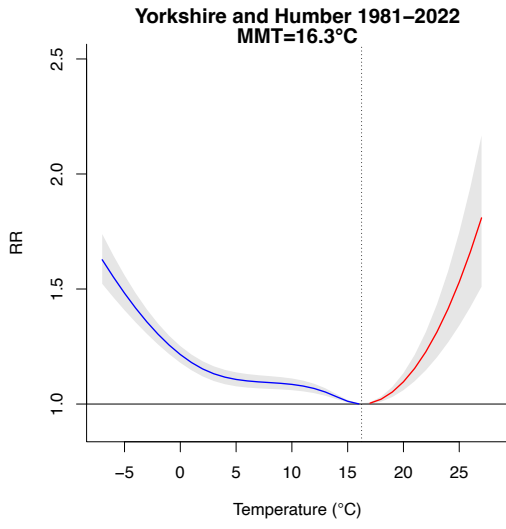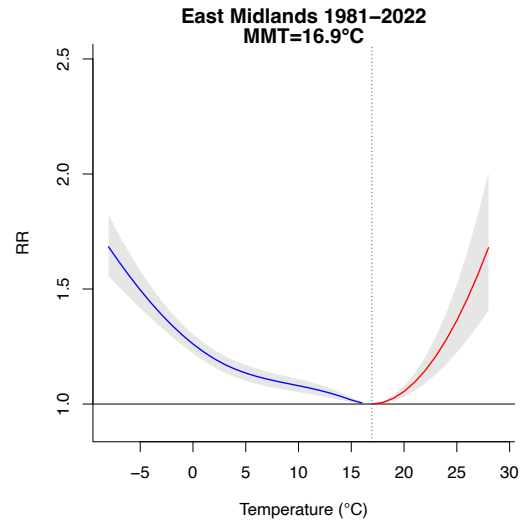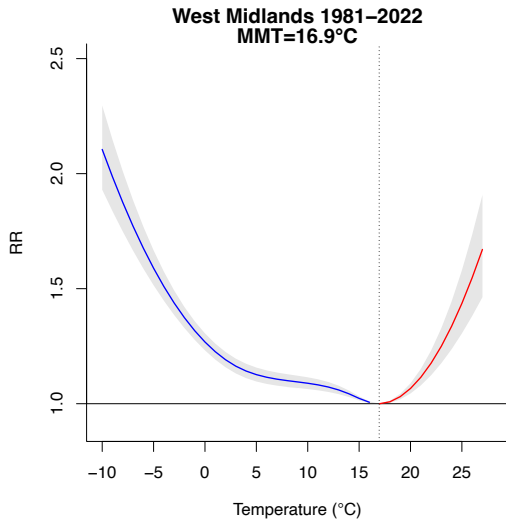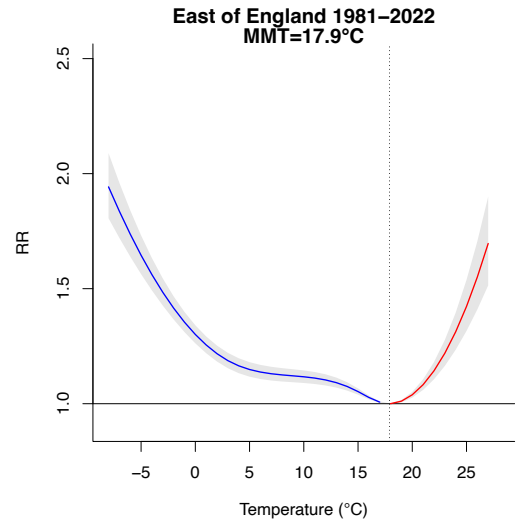

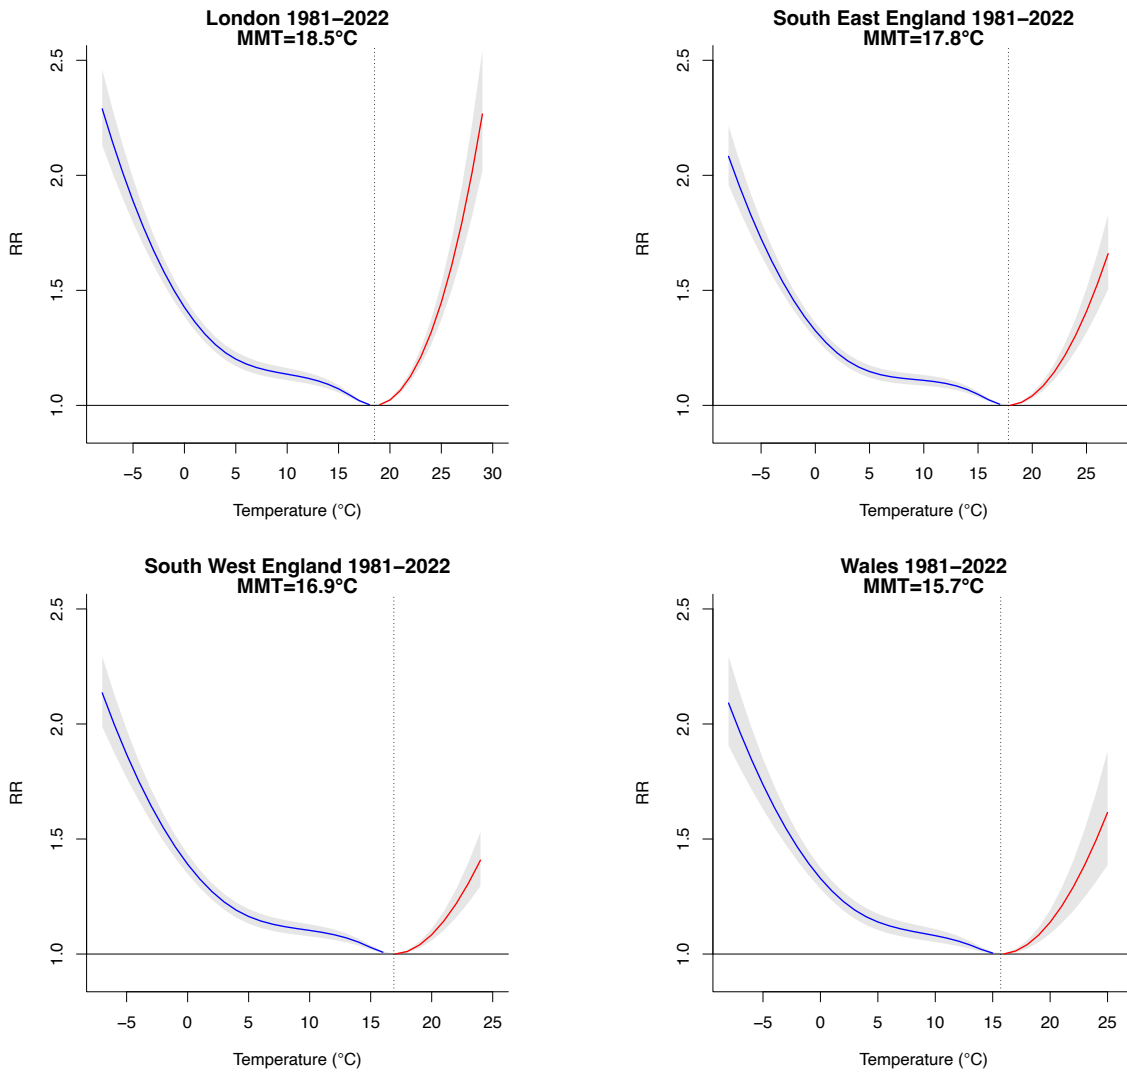

**Figure S3. Temperature-mortality associations for all studied regions in the period 1981-2022.** The y axis shows relative risk of mortality (RR), whereas the x axis indicates daily mean temperature. The grey shading shows the 95% confidence interval. The minimum mortality temperature (MMT) is shown at the top of each panel, as well as indicated by the grey vertical dashed line.

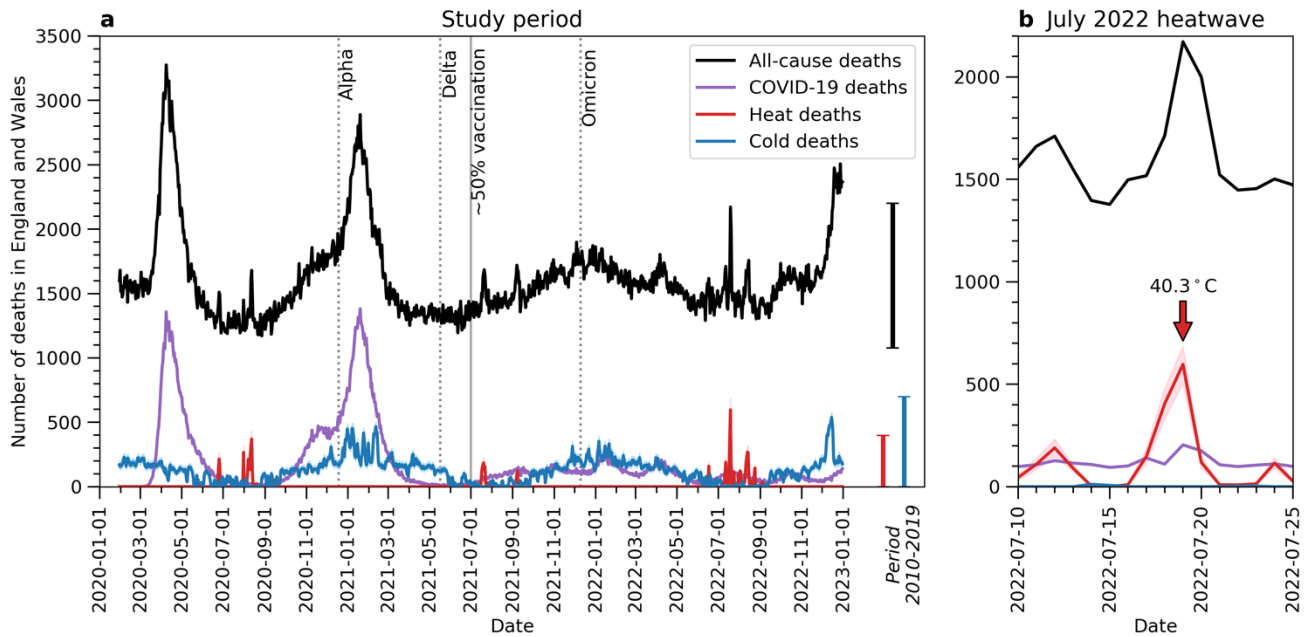

**Figure S4. Same as Figure 1 in the main manuscript, but with heat and cold deaths estimated from population weighted average temperatures.** Population weighted average temperatures were calculated from 25 km HadUK-Grid temperatures and 2021 Census Lower layer Super Output Area population aggregated to the 25 km grid.

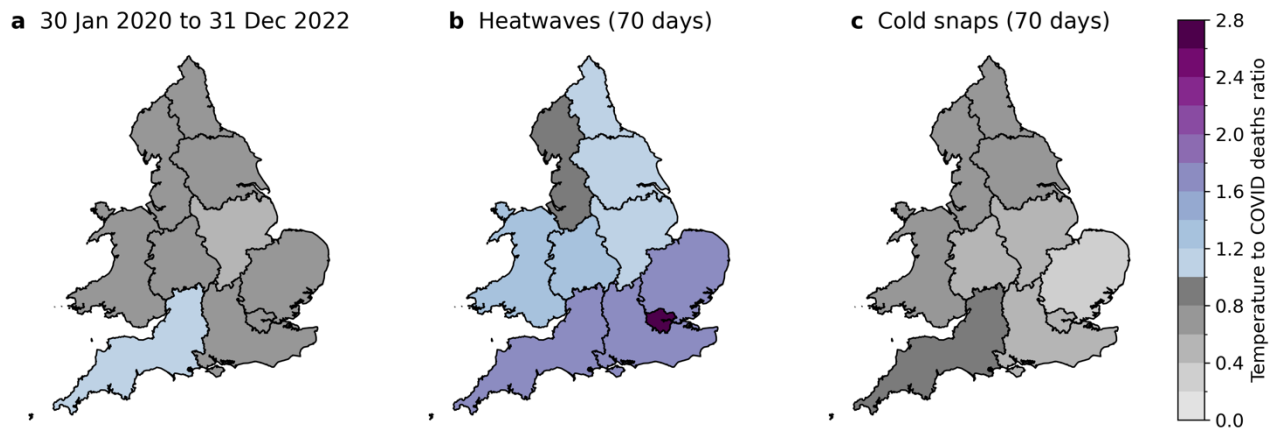

**Figure S5. Same as Figure 2 in the main manuscript, but with temperature-related deaths estimated from population weighted regional average temperatures.** Population weighted average temperatures were calculated from 25 km HadUK-Grid temperatures and 2021 Census Lower layer Super Output Area population aggregated to the 25 km grid.

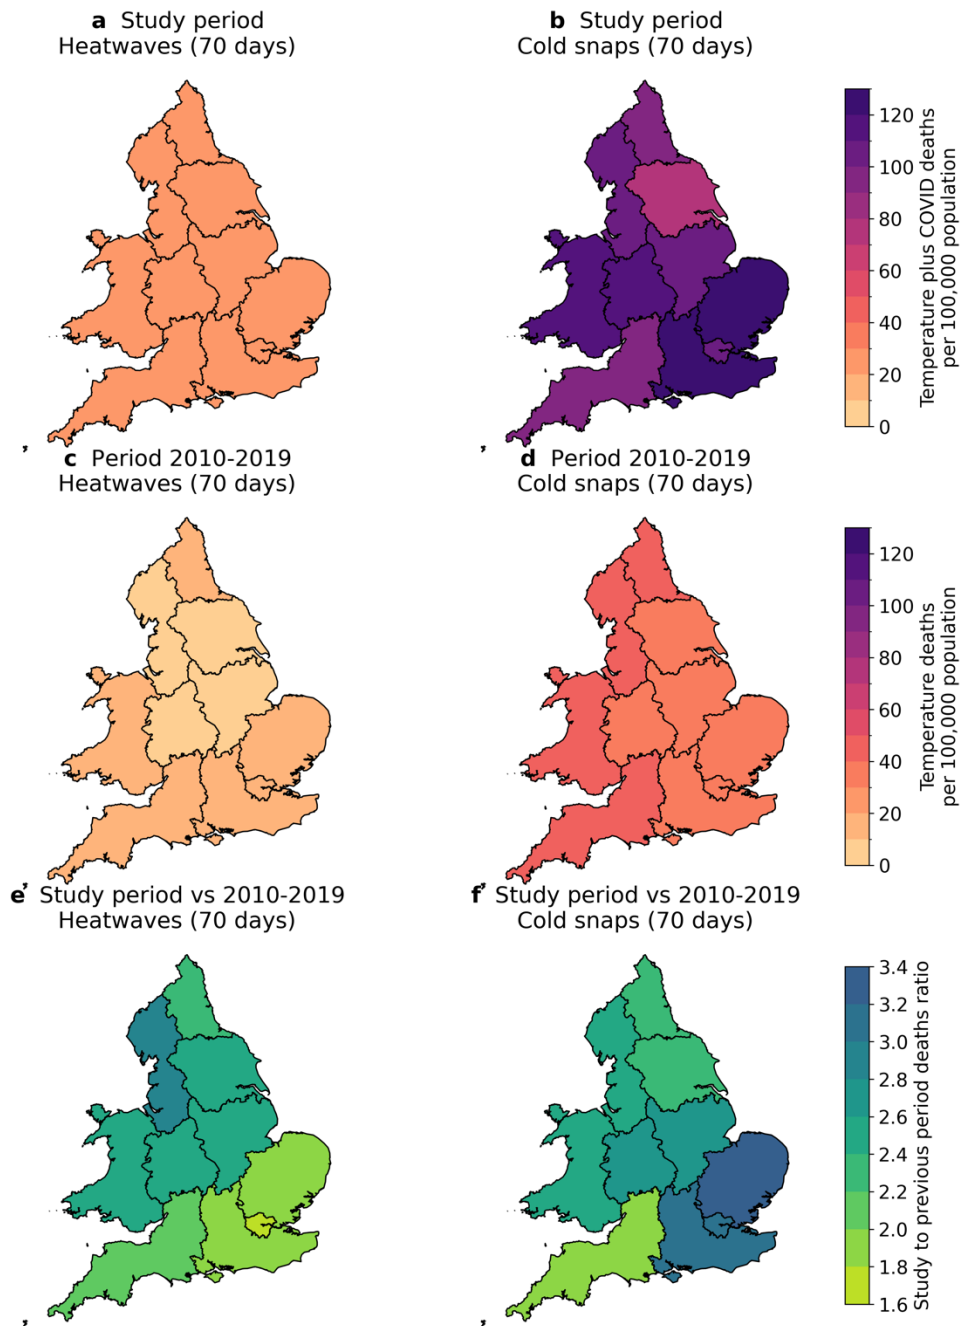

**Figure S6. Same as Figure 3 in the main manuscript, but with temperature-related deaths estimated from population weighted regional average temperatures. Population weighted average temperatures were calculated from 25 km HadUK-Grid temperatures and 2021 Census Lower layer Super Output Area population aggregated to the 25 km grid.**



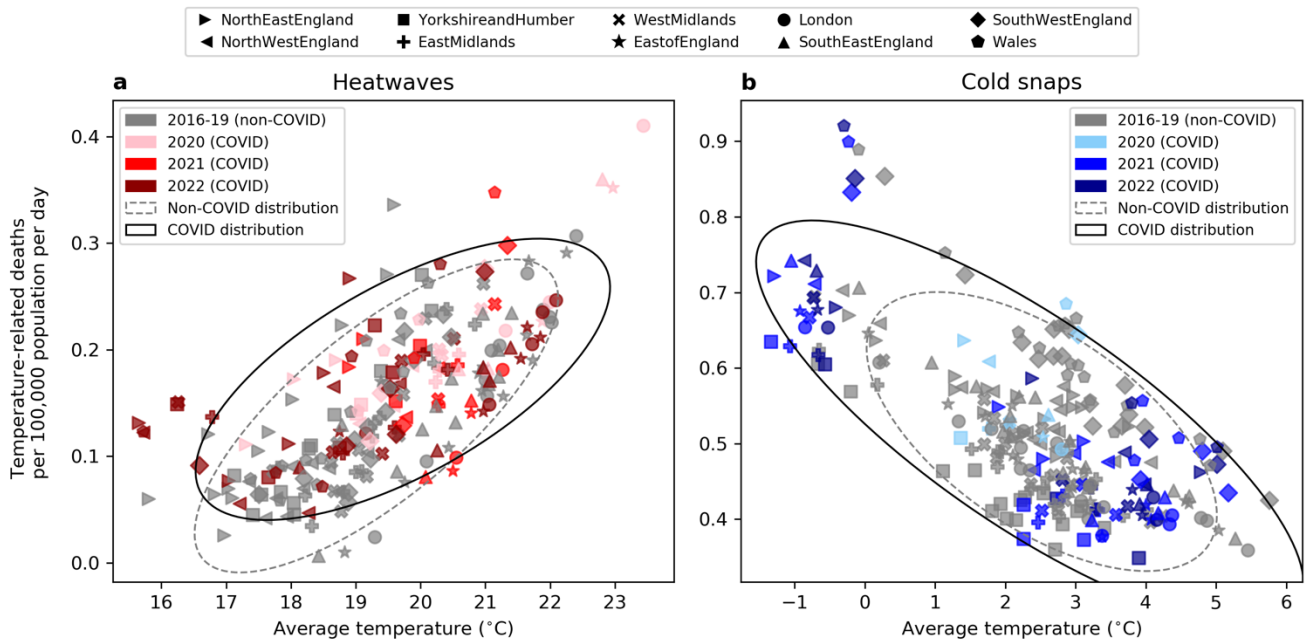

**Figure S7. Same as Figure 4 in the main manuscript, but with temperature-related deaths estimated from population weighted regional average temperatures. Population weighted average temperatures were calculated from 25 km HadUK-Grid temperatures and 2021 Census Lower layer Super Output Area population aggregated to the 25 km grid.**
